# Supplementary material for: Towards sustainable synthesis: a life cycle assessment of polymer of intrinsic microporosity (PIM-1) by green mechanosynthesis
Source: Royal Society of Chemistry journal article supplement (doi:10.1039/d3su00340j), 2023-01-01
Supplement: d3su00340j1.pdf [file d3su00340j1.pdf]

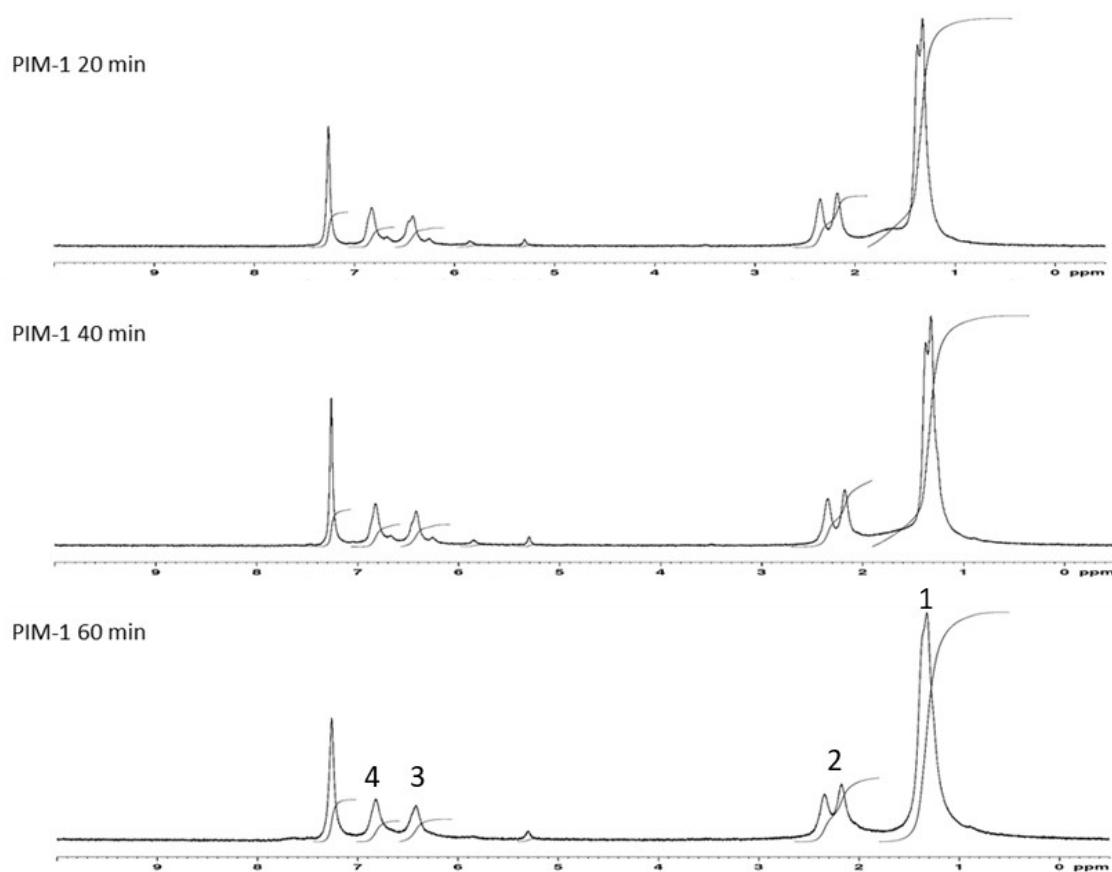

**Figure S1** NMR spectra results for PIM-1 in various time-intervals with 1:64 reactants-balls mass ratio.

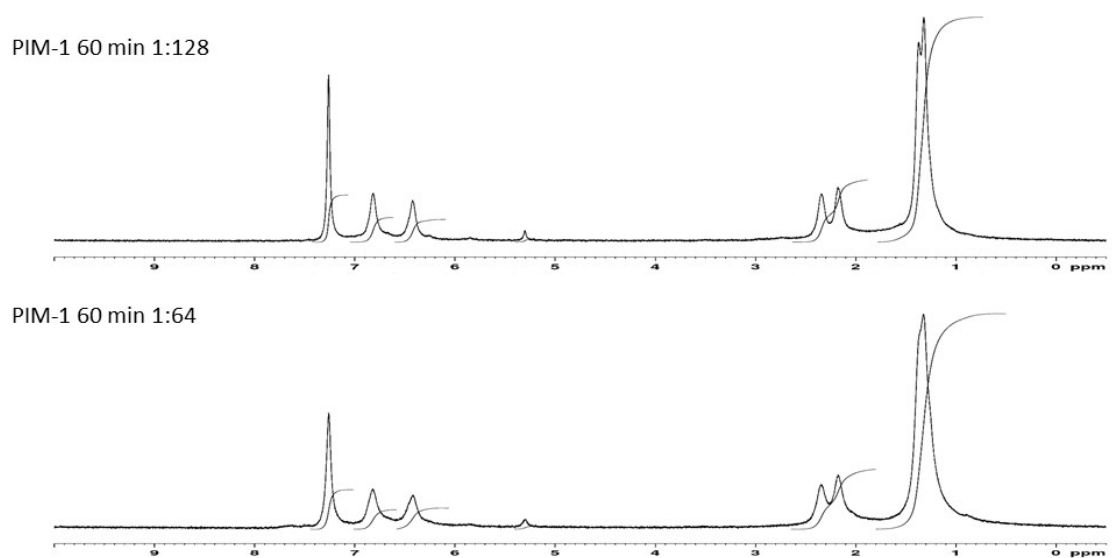

**Figure S2** . NMR spectra results for PIM-1 using different reactants to balls ratio at 60 min.

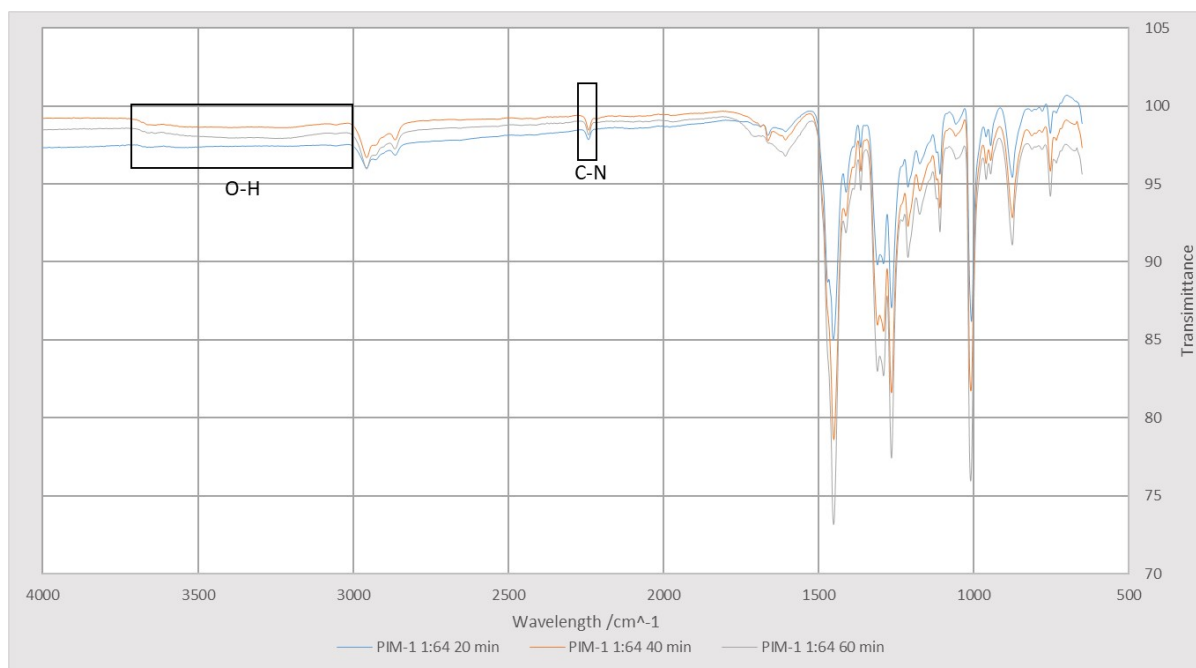

**Figure S3** FT-IR spectrum of PIM-1 in different time-intervals

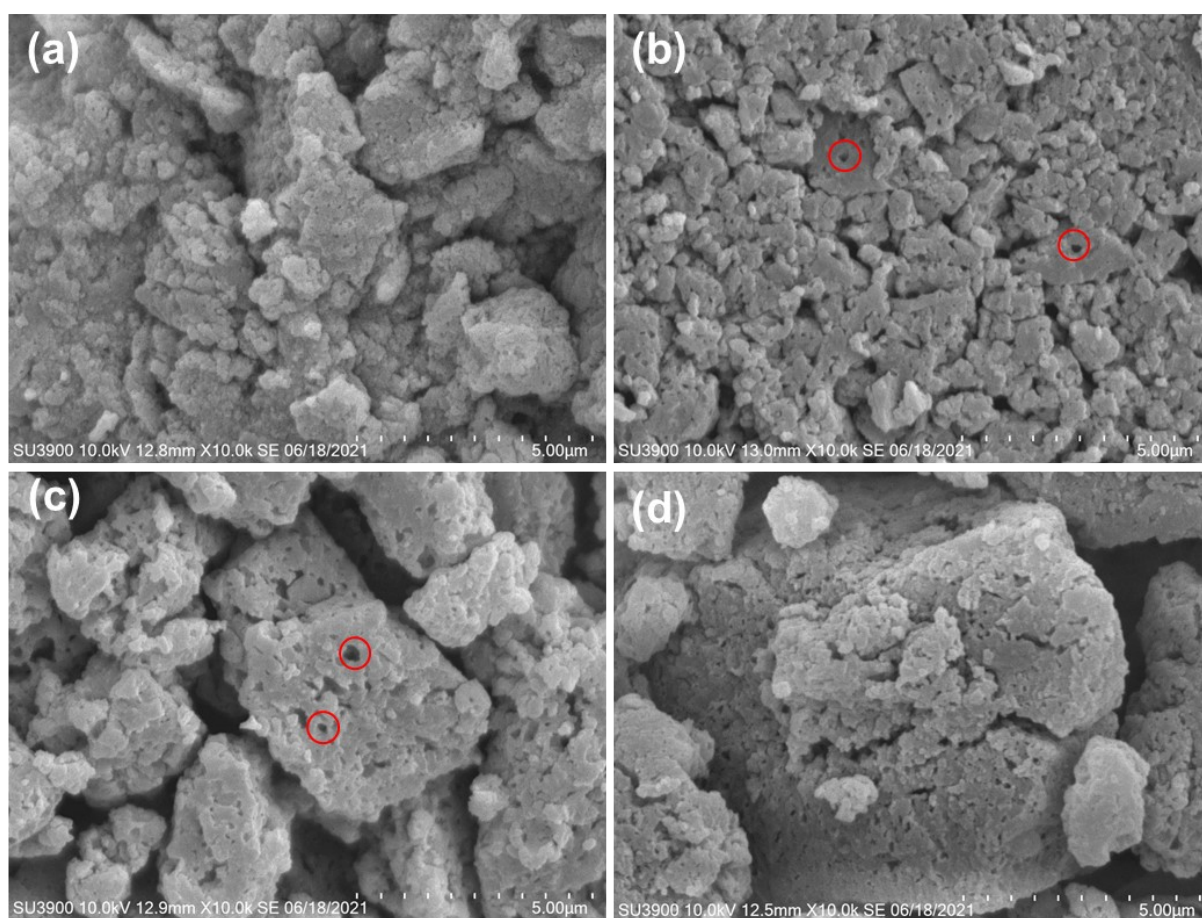

**Figure S4** SEM images of PIM-1 in (a) 20 min, (b) 40 min, and (c) 60 min time-intervals with 1:64 reactants to ball mass ratio and (d) in 60 min with 1:128 reactants to ball mass ratio at 10,000x magnification.

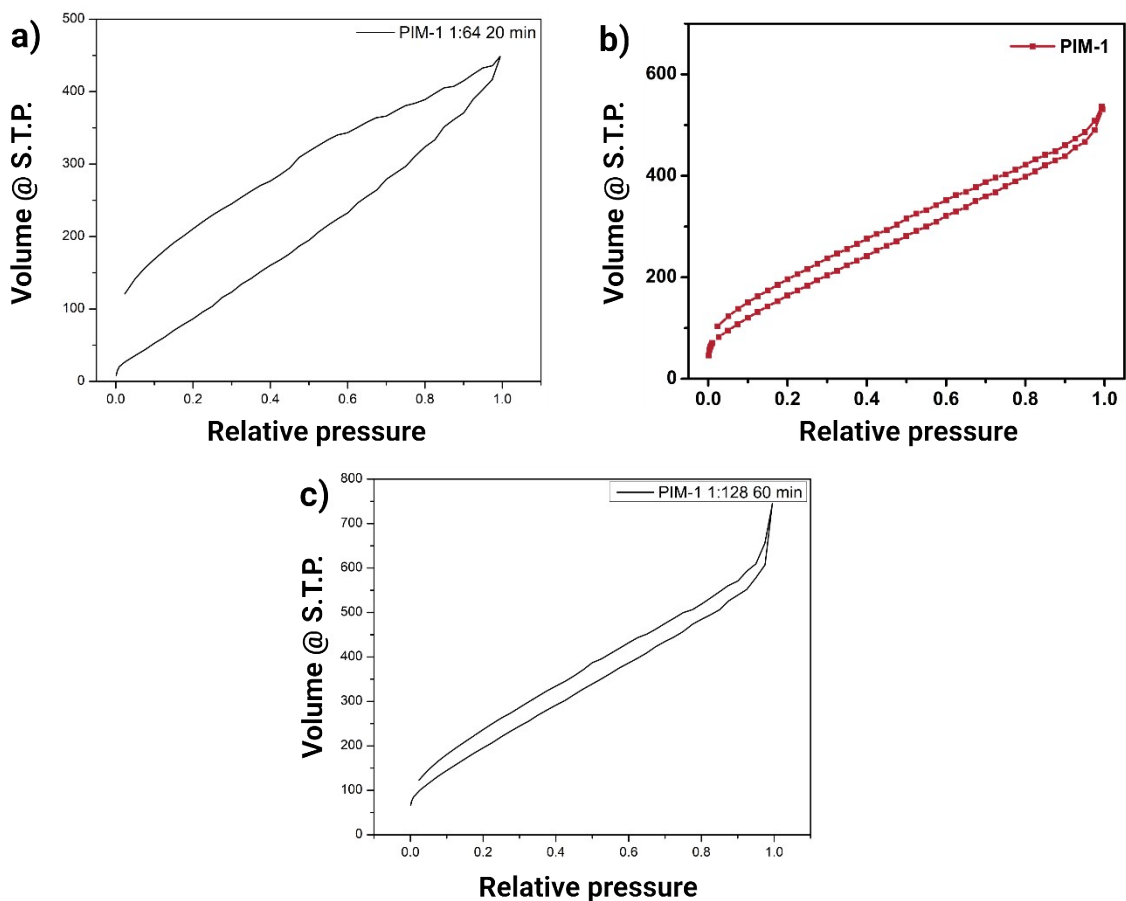

**Figure S5** Adsorption-desorption isotherm of PIM-1 at (a) 20 min and (b) 60 min with 1: 64 reactants-to-ball ratio and (c) 60 min with 1:128 reactants-to-balls ratio.

**Table S1** Inventory inputs and outputs for both synthesis methods.

| Inputs | Unit | Provider    | Quantity         |                     |                                                                                                                                                                                            |
|--------|------|-------------|------------------|---------------------|--------------------------------------------------------------------------------------------------------------------------------------------------------------------------------------------|
|        |      |             | Mechanosynthesis | Wet Chemical Method | Data/ Remark                                                                                                                                                                               |
| TTSBI  | mg   | Assumptions | 680.0            | 681.0               | <b>Mechanosynthesis:</b><br>Calculated using concentration ratio.<br><b>Wet Chemical Method:</b> A scale factor of 0.133 is used to correspond with the product yield of mechanosynthesis. |
| TFTPN  | mg   | Assumptions | 400.0            | 400.0               | <b>Mechanosynthesis:</b><br>Calculated using concentration ratio.<br><b>Wet Chemical Method:</b> A scale factor of 0.133 is used to correspond with the product yield of mechanosynthesis. |

|                                         |     |                                                                                                                                                              |                      |                      |                                                                                                                                                                                         |
|-----------------------------------------|-----|--------------------------------------------------------------------------------------------------------------------------------------------------------------|----------------------|----------------------|-----------------------------------------------------------------------------------------------------------------------------------------------------------------------------------------|
| K <sub>2</sub> CO <sub>3</sub>          | mg  | market for potassium carbonate   potassium carbonate   Cutoff, U - GLO                                                                                       | 1200                 | 826.67               | <b>Mechanosynthesis:</b> Calculated using concentration ratio.<br><b>Wet Chemical Method:</b> A scale factor of 0.133 is used to correspond with the product yield of mechanosynthesis. |
| Toluene                                 | ml  | market for toluene, liquid   toluene, liquid   Cutoff, U - RER                                                                                               | -                    | 0.6                  | <b>Wet Chemical method:</b> A scale factor of 0.133 is used to correspond with the product yield of mechanosynthesis.                                                                   |
| DMSO                                    | ml  | market for dimethyl sulfoxide   dimethyl sulfoxide   Cutoff, U - GLO                                                                                         | -                    | 5.3                  | <b>Wet Chemical method:</b> A scale factor of 0.133 is used to correspond with the product yield of mechanosynthesis.                                                                   |
| Ethanol                                 | ml  | market for ethanol, without water, in 99.7% solution state, from ethylene   ethanol, without water, in 99.7% solution state, from ethylene   Cutoff, U - RER | 85.3                 | 85.3                 | <b>Mechanosynthesis and Wet Chemical method:</b> The chemicals are scaled towards 10mg of product will use up 1ml of chemicals to wash.                                                 |
| Methanol                                | ml  | market for methanol   methanol   Cutoff, U - GLO                                                                                                             | 85.3                 | -                    | <b>Wet Chemical method:</b> The chemicals are scaled towards 10mg of product will use up 1ml of chemicals to wash.                                                                      |
| De-ionised water                        | ml  | water production, deionised   water, deionised   Cutoff, U - Europe without Switzerland                                                                      | 85.3                 | 85.3                 | <b>Mechanosynthesis and Wet Chemical method:</b> The chemicals are scaled towards 10mg of product will use up 1ml of chemicals to wash.                                                 |
| Electricity for heat (silicon oil bath) | kWh | market for electricity, high voltage   electricity, high voltage   Cutoff, U - GB                                                                            | -                    | 0.4 (for 8 hours)    | <b>Wet Chemical method:</b> A water bath, NE1D-4 used as the power rating reference.                                                                                                    |
| Electricity for stirring                | kWh | market for electricity, high voltage   electricity, high voltage   Cutoff, U - GB                                                                            | -                    | 0.8 (for 8.05 hours) | <b>Wet Chemical method:</b> A disperser, T 25 digital ULTRA-TURRAX ® used as the power rating reference.                                                                                |
| Electricity for milling                 | kWh | market for electricity, high voltage   electricity, high voltage   Cutoff, U - GB                                                                            | 0.1 (for 15 minutes) | -                    | <b>Mechanosynthesis:</b> A high frequency mixer mill, MM 200 was used as the power rating reference.                                                                                    |
| Electricity for                         | kWh | market for                                                                                                                                                   | 1.65 (for 90         | 1.65 (for 60         | <b>Mechanosynthesis and Wet Chemical</b>                                                                                                                                                |

|                                        |     |                                                                                   |                     |                     |                                                                                                                                                                                             |
|----------------------------------------|-----|-----------------------------------------------------------------------------------|---------------------|---------------------|---------------------------------------------------------------------------------------------------------------------------------------------------------------------------------------------|
| centrifugation                         |     | electricity, high voltage   electricity, high voltage   Cutoff, U - GB            | minutes)            | minutes)            | <b>method:</b> Eppendorf – centrifuge 5810R was used as the power rating reference.                                                                                                         |
| Electricity for heat (oven for drying) | kWh | market for electricity, high voltage   electricity, high voltage   Cutoff, U - GB | 0.75 (for 24 hours) | 0.75 (for 24 hours) | <b>Mechanosynthesis and Wet Chemical method:</b> A digital oven, GENLAB – MINO/40/TDIG was used as the power rating reference.                                                              |
| Output                                 |     |                                                                                   |                     |                     |                                                                                                                                                                                             |
| PIM-1                                  | mg  | -                                                                                 | 834.96              | 793.569             | <b>Mechanosynthesis:</b> A product of 853.0mg with the yield (98%) considered<br><b>Wet Chemical Method:</b> A product of 853.0mg (scale factor of 0.1333) with the yield (93%) considered. |

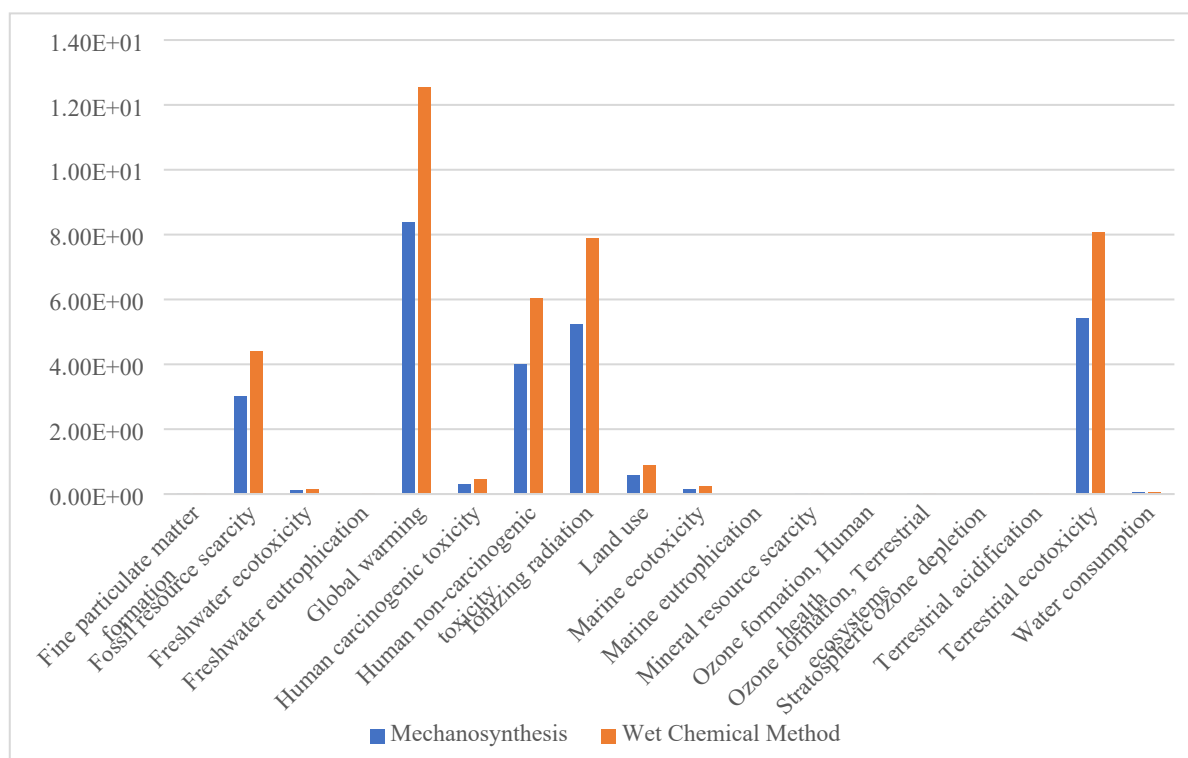

**Figure S6** Normalised ReCiPe (2016) Midpoint (H) analysis result
